# Supplementary material
Source: PubMed Central journal article supplement (PMC4025949)
Supplement: NIHMS56021-supplement-Supplementary_figs_and_tables.pdf [file NIHMS56021-supplement-Supplementary_figs_and_tables.pdf]

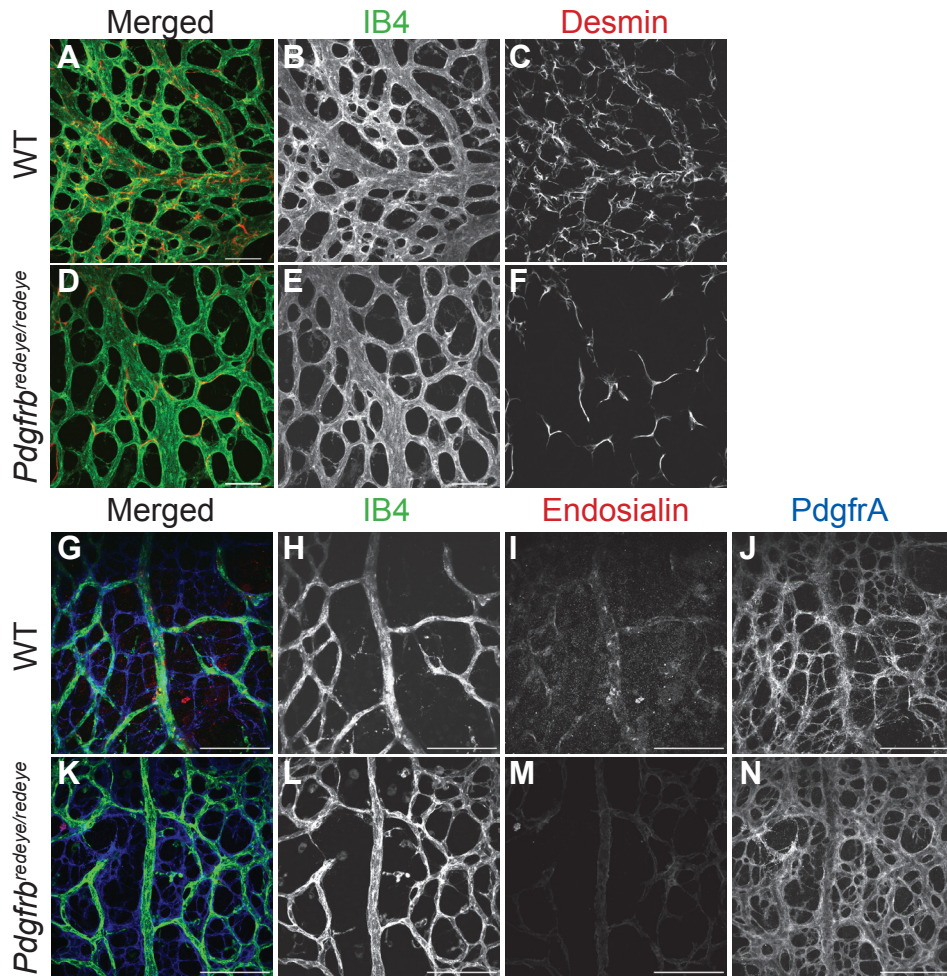

**Supplementary Figure S1: Endosialin and Desmin expression are reduced in *Pdgfrb*<sup>redeye/redeye</sup> mutants but *Pdgfra* expression is unchanged**

Due to the lack of a specific pericyte marker, further markers were used to confirm the reduction in pericyte coverage in *Pdgfrb*<sup>redeye/redeye</sup> mutants. Representative images of P10 retinal vasculature show desmin, a marker for CNS pericytes, is expressed in WT retinae (A-C) but is reduced in *Pdgfrb*<sup>redeye/redeye</sup> mutants (D-F). Endosialin is a transmembrane glycoprotein expressed in immature pericytes as seen in WT (G-I) but not in *Pdgfrb*<sup>redeye/redeye</sup> mutants (K-M). Although *Pdgfra* is expressed by astrocytes in the WT retina (J), it is able to bind *PdgfB* but is not upregulated as a consequence of reduced *Pdgfrβ* in the *Pdgfrb*<sup>redeye/redeye</sup> mutants (N). All scale bars: 100 μm.

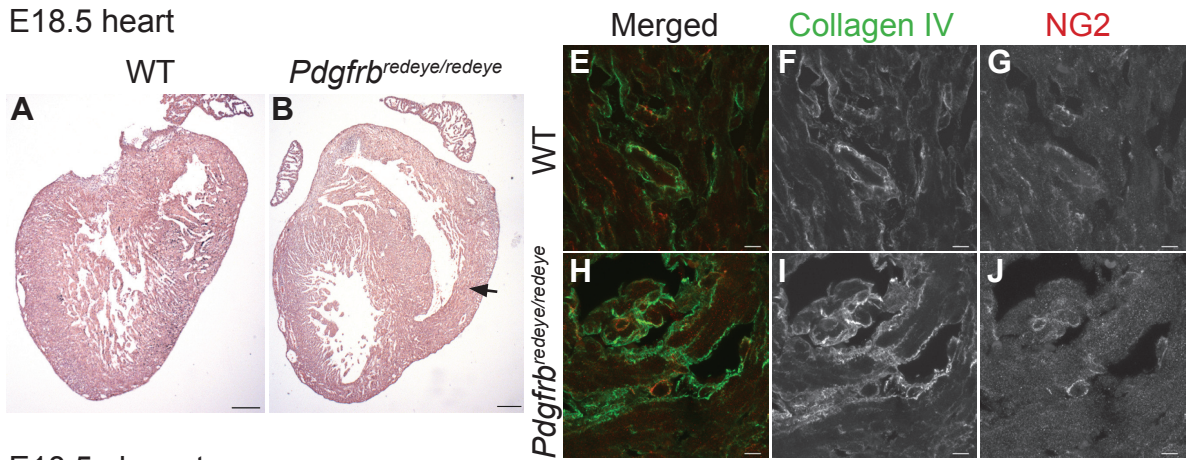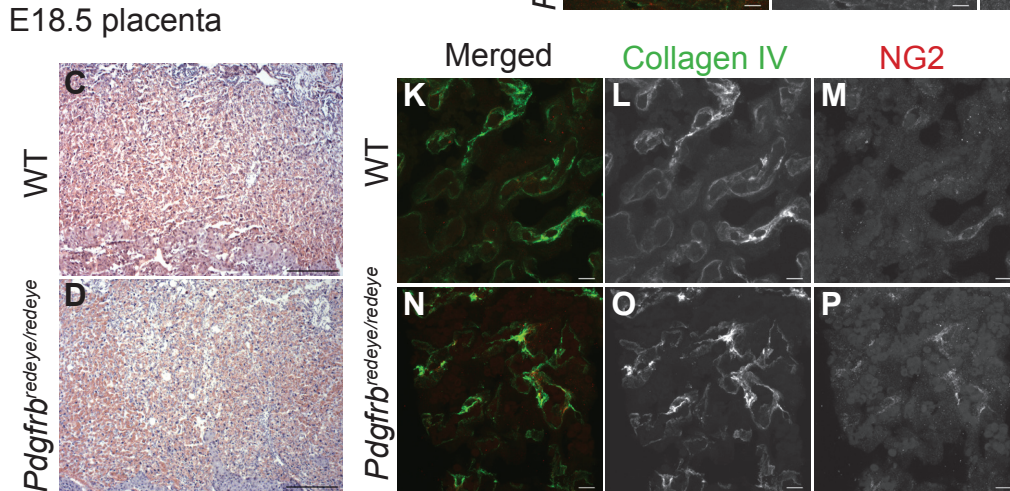

### Supplementary Figure S2: Embryonic heart and placenta development are not impaired in *Pdgfrb<sup>redeye/redeye</sup>* mutants

To determine whether the *Pdgfrb<sup>redeye/redeye</sup>* mutants had a CNS-specific phenotype, we looked at embryonic E18.5 hearts and placentae which have been previously reported to be abnormal in endothelial knockouts of PdgfB. Haematoxylin and eosin staining shows that there are no gross defects in the heart (A, B), with the myocardium exhibiting normal thickness (arrow), and the histology of the placenta also revealed no gross pathology (C, D). Pericyte recruitment was analysed by staining cryosections of these organs with Collagen IV to label blood vessels and Proteoglycan NG2 to label pericytes. Pericytes were found at WT levels in both the heart (E-J) and placenta (K-P). Scale bars: 250  $\mu$ m (A-D) or 10  $\mu$ m (E-P).

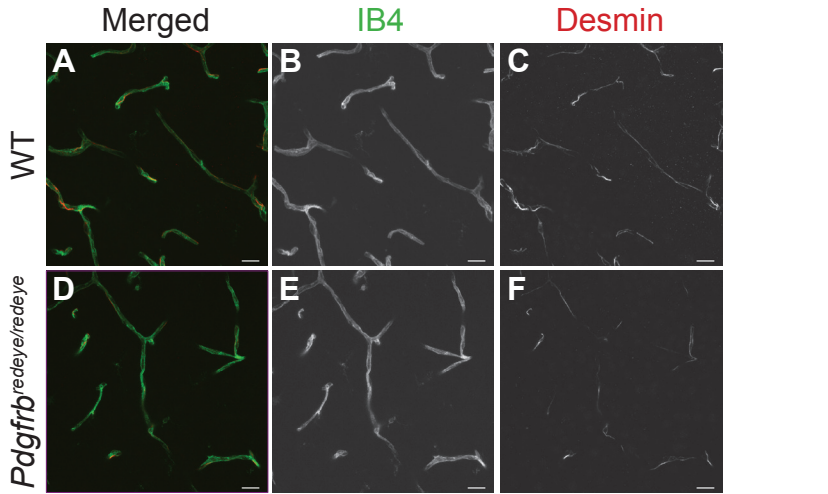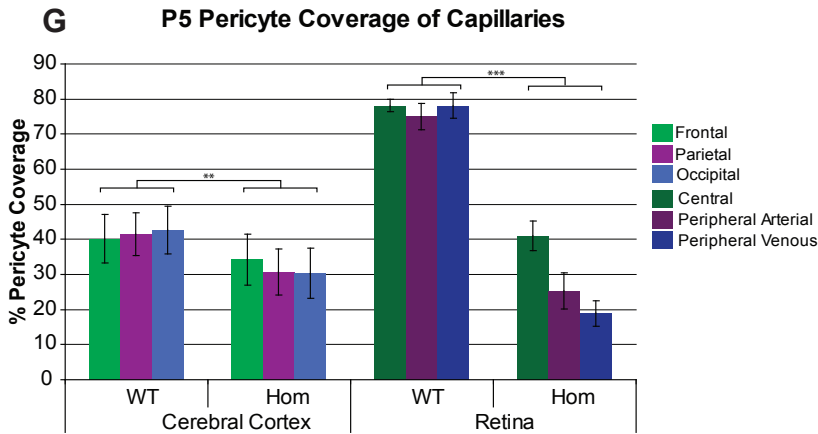

### Supplementary Figure S3: Pericyte density is higher in retinal capillaries compared to cerebral capillaries

MetaMorph software was used for the quantification of pericyte coverage as determined by desmin (pericytes) and IB4 (vessels) staining in the cerebral cortex of WT (A-C) and *Pdgfrb<sup>redeye/redeye</sup>* P5 mice (D-F). This shows a statistically significant decrease in pericyte coverage in Homozygous animals (Hom) compared to WT (G). (SRH test P < 0.005, \*\*Mann-Whitney U-test P < 0.005). To confirm that this lower coverage in wildtype cerebral cortex capillaries was not due to differences in staining from using desmin as a marker for pericytes rather than NG2, P5 retinae were also quantified using desmin. There is a statistically significant difference in pericyte coverage of retinal capillaries in P5 Homozygous animals (Hom) compared to WT (G) (SRH test P < 0.001, \*\*\*Mann-Whitney U-test P < 0.001).

### Glucose Tolerance Tests

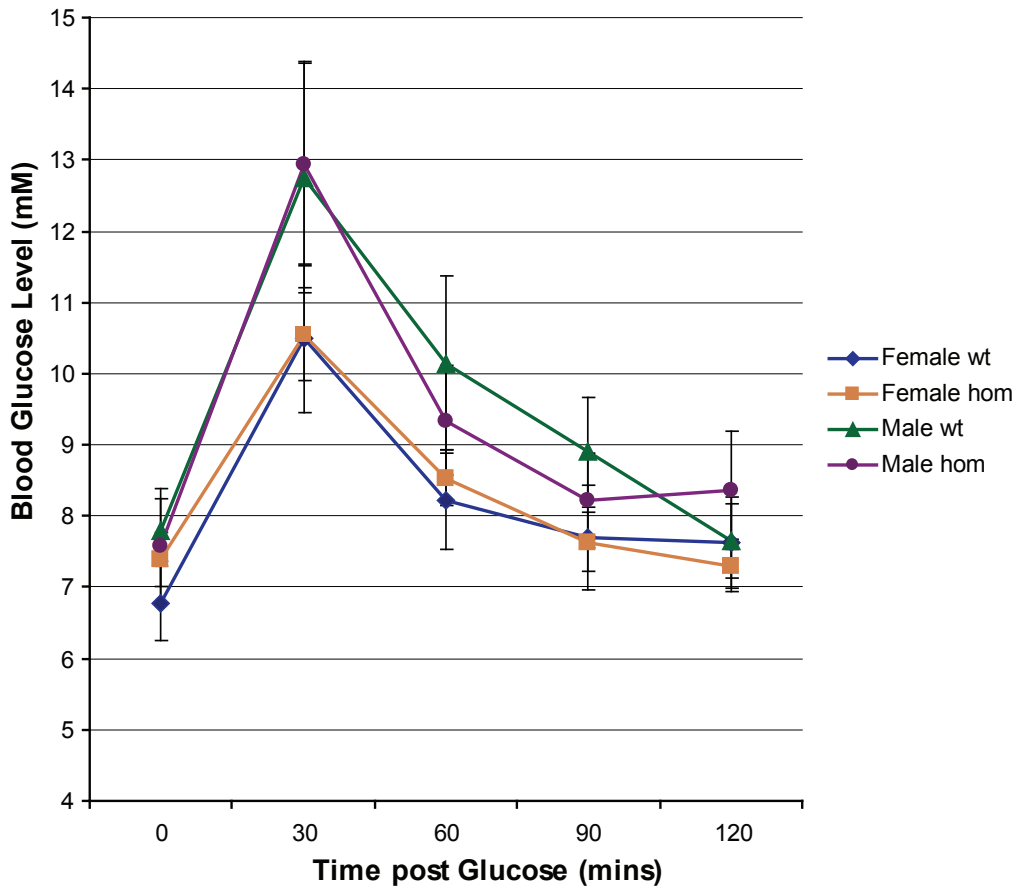

### Supplementary Figure S4: The *Pdgfrb*<sup>redeye/redeye</sup> mutants are not diabetic

In order to confirm that the retinopathy in the redeye mutants was not caused by diabetes we performed glucose tolerance tests in animals aged 8 weeks. Neither females nor males are intolerant to glucose and are able to clear excess glucose from their system. Error bars: standard deviation of the mean.

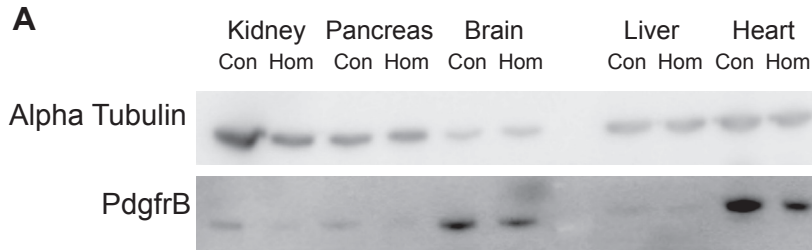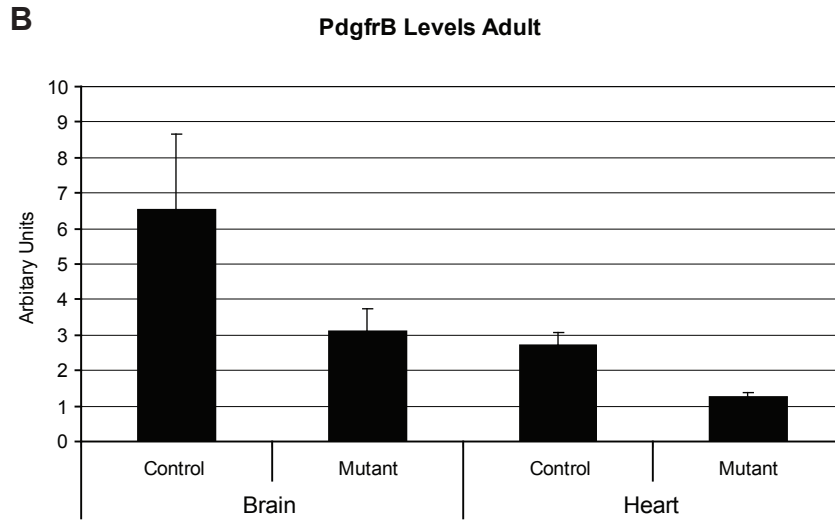

### Supplementary Figure S5: Pdgfr $\beta$ expression in Adult Organs

In order to confirm that the retinopathy in the *redeye* mutants was not caused by diabetes we performed glucose tolerance tests in animals aged 8 weeks. Neither females nor males are intolerant to glucose and are able to clear excess glucose from their system.

Error bars: standard deviation of the mean.

| <b>Antibody/ stain</b>                                                   | <b>Supplier</b>                     | <b>Dilution used</b> |
|--------------------------------------------------------------------------|-------------------------------------|----------------------|
| Flourescein-conjugated<br><i>Griffonia simplicifolia</i><br>Isolectin B4 | Vector Laboratories, UK             | 1:500                |
| Collagen IV                                                              | AbD Serotec, UK                     | 1:500                |
| ASMA                                                                     | Abcam, UK                           | 1:500                |
| Proteoglycan NG2                                                         | Millipore UK Ltd, UK                | 1:200                |
| Podocalyxin                                                              | R & D Systems, UK                   | 1:100                |
| Pdgfr $\beta$                                                            | Abcam, UK                           | 1:500                |
| Desmin                                                                   | Abcam, UK                           | 1:500                |
| Endosialin                                                               | MacFadyen et al., 2005              | 1:500                |
| Claudin 5                                                                | Invitrogen, UK                      | 1:500                |
| Angiopoietin 1                                                           | Abcam, UK                           | 1:200                |
| ZO1                                                                      | Invitrogen, UK                      | 1:100                |
| Brn3                                                                     | Santa Cruz, Germany                 | 1:200                |
| Pdgfra                                                                   | BD Biosciences, UK                  | 1:200                |
| F4/80                                                                    | AbD Serotec, UK                     | 1:500                |
| secondary Alexa-488                                                      | Molecular Probes, Invitrogen,<br>UK | 1:500                |
| secondary Alexa-594                                                      | Molecular Probes, Invitrogen,<br>UK | 1:500                |
| secondary Alexa-647                                                      | Molecular Probes, Invitrogen,<br>UK | 1:500                |

**Supplementary Table S1: Antibodies and Stains used for immunofluorescence**



| <b>Antibody</b>                     | <b>Supplier</b>       | <b>Dilution used</b> |
|-------------------------------------|-----------------------|----------------------|
| Alpha tubulin                       | Abcam, UK             | 1:5000               |
| Pdgr $\beta$                        | Source Bioscience, UK | 1:10000              |
| HRP-conjugated secondary antibodies | Fisher Scientific, UK | 1:5000               |

**Supplementary Table S2: Antibodies used for immunoblotting**

| Comparison                                                             | Figure        | Primary Statistical Test             | Post Test                         |
|------------------------------------------------------------------------|---------------|--------------------------------------|-----------------------------------|
| Retinal pericyte coverage at P5 & P10                                  | 2K-L          | SRH (Factors: genotype and region)   | MWU Tests + Bonferroni Correction |
| No. of Avascular regions/ mm <sup>2</sup>                              | 5E            | ANOVA (Factors: genotype and region) | TukeyHSD                          |
| No. of Branchpoints/ mm <sup>2</sup>                                   | 5F            | ANOVA (Factors: genotype and region) | TukeyHSD                          |
| RGC counts                                                             | 6M            | Kruskall-Wallis test                 | MWU Tests + Bonferroni Correction |
| Cerebral cortex and retinal pericyte coverage at P5 by Desmin staining | Supp. Fig. S3 | SRH (Factors: genotype and region)   | MWU Tests                         |

### Supplementary Table S3: Statistical Analysis Undertaken

The normality of the data analysed was assessed by Shapiro-Wilk test and by visual inspection and subsequently the appropriate parametric or non-parametric tests were performed.

SRH: two-way Scheirer-Ray-Hare (SRH) extension of the Kruskal-Wallis rank sum test,

MWU Tests: pairwise Mann-Whitney U-tests. ANOVA: two-way ANalysis Of VAriance,

TukeyHSD: pairwise Tukey's Honestly Significant Difference. Prior to analysis the avascular

regions /mm<sup>2</sup> and branchpoints/ mm<sup>2</sup> data was root and probit transformed respectively.
